# Supplementary material for: Technical note: Rapid phase identification of apatite and zircon grains for geochronology using X-ray micro-computed tomography
Source: Copernicus journal article supplement (doi:10.5194/gchron-2022-7), 2022-03-18
Supplement: Supplementary file 1 [file gchron-2022-7-supplement.zip]

## Sheet: grayscale values
Mount	Sample	Grain/shard	Type	Mineral	Volume	X-position	Y-position	Z-position	Grayscale	1σ	RSD	Grayscale	1σ	RSD	60 kV/130 kV	1σ	Normalized*	1σ	Normalized*	1σ
					[µm³]	[µm]	[µm]	[µm]	at 130 kV			at 130 kV					at 130 kV		at 60 kV
A	UT-DUR	shard	standard	apatite	10741.2	2277.43	3766.64	748.498	1653.79	44.2079	0.0267312	2828.1	87.9504	0.0310987	1.71007	0.0410084	0.278009	0.00743152	0.203292	0.0122402
A	UT-DUR	shard	standard	apatite	30371.7	2154.89	3767.65	974.828	1183.07	241.055	0.203754	1901.82	308.696	0.162317	1.60752	0.260504	0.198879	0.0405223	0.226989	0.00664202
A	SL1	shard	standard	zircon	34075.5	3852.62	3671.26	1424.77	5538.78	798.291	0.144128	11432.8	1399.52	0.122413	2.06413	0.189097	0.93109	0.134196	0.226011	0.0071904
A	UT-DUR	shard	standard	apatite	51298.5	2229.17	3792.97	1304.07	1645.7	53.9735	0.0327968	2774.02	117.536	0.0423704	1.68562	0.0535806	0.276648	0.00907316	1.11063	0.0552583
A	UT-DUR	shard	standard	apatite	70373.3	2392.05	3774.94	1403.59	1477.69	68.6331	0.0464463	2399.18	145.531	0.0606586	1.62361	0.0763985	0.248405	0.0115375	1.09417	0.0665096
A	UT-FCT	shard	standard	apatite	72595.7	3306.83	3722.76	1842.86	1613.29	44.5533	0.0276165	2730.73	86.8766	0.0318144	1.69265	0.0421287	0.2712	0.00748959	1.18388	0.0700927
A	UT-FCT	shard	standard	apatite	80188.6	2787.01	3761.89	1966.58	1624.62	47.1263	0.0290076	2743.78	90.8079	0.033096	1.68887	0.0440089	0.273105	0.00792212	0.226931	0.00805748
A	UT-FCT	shard	standard	apatite	80559	3994.59	3680.03	1866.19	1628.78	56.6062	0.0347538	2757.33	116.7	0.0423235	1.69288	0.054764	0.273804	0.00951572	1.08253	0.0812239
A	UT-DUR	shard	standard	apatite	90189	2192.34	3772.85	1169.82	1498.07	97.4551	0.0650536	2509.64	204.55	0.0815056	1.67524	0.104284	0.251832	0.0163826	1.06239	0.0404622
A	UT-FCT	shard	standard	apatite	93522.5	3749.67	3711.78	2490.75	1335.93	95.967	0.0718355	2152.19	183.456	0.0852413	1.61101	0.111474	0.224574	0.0161324	0.173273	0.0255185
A	UT-FCT	grain	unknown	zircon	95930	2036.93	3826	2891.95	6686.57	394.21	0.0589555	13469.7	672.284	0.0499107	2.01444	0.0772453	1.12404	0.0662683	1.06586	0.0680533
A	UT-FCT	shard	standard	apatite	100004	3657.97	3725.74	2946.07	1519.25	41.7	0.0274478	2542.31	66.8783	0.0263061	1.6734	0.0380183	0.255391	0.00700992	0.213945	0.00639869
A	UT-FCT	shard	standard	apatite	102041	3223.86	3739.6	2499.76	1316.74	160.647	0.122004	2029.69	322.192	0.158739	1.54145	0.200207	0.221349	0.0270054	0.214474	0.00670879
A	UT-FCT	shard	standard	apatite	104078	3684.32	3701.91	1822.02	1640.11	48.2305	0.0294069	2793.23	78.7154	0.0281808	1.70308	0.0407299	0.275708	0.00810773	0.178525	0.0314225
A	CIT-DUR	shard	standard	apatite	110190	3866.43	3693.55	2195.94	1570.01	126.595	0.0806333	2773.29	138.696	0.0500116	1.76641	0.0948836	0.263924	0.0212811	0.23407	0.00727928
A	UT-FCT	shard	standard	apatite	115560	2907.25	3770.82	2879.42	1481.27	75.4994	0.0509694	2456.23	147.889	0.0602097	1.6582	0.0788866	0.249007	0.0126917	1.06737	0.0606445
A	UT-FCT	shard	standard	apatite	120746	2167.21	3797.63	1866.44	1600.83	53.1658	0.0332115	2742.55	80.2508	0.0292614	1.71321	0.0442633	0.269105	0.00893738	0.20724	0.0068966
A	SL1	shard	standard	zircon	121301	2262.68	3799.38	1615.51	6584.2	327.291	0.0497085	13419	667.647	0.0497539	2.03806	0.0703305	1.10683	0.0550188	0.227091	0.00751578
A	UT-FCT	grain	unknown	zircon	121857	2161.01	3820.79	2881.84	6568.77	454.087	0.0691282	13220.1	803.588	0.0607851	2.01258	0.0920519	1.10423	0.0763338	0.225533	0.00685101
A	UT-FCT	grain	unknown	zircon	132228	2718.8	3782.55	2543.59	6353.08	289.65	0.0455921	12836.1	488.877	0.0380862	2.02045	0.059407	1.06798	0.0486913	0.205412	0.00710317
A	UT-FCT	grain	unknown	zircon	134265	3564.02	3723.95	2511.71	6348.4	590.36	0.0929936	12724.3	1187.09	0.0932934	2.00433	0.131725	1.06719	0.0992419	0.225139	0.00840392
A	UT-FCT	grain	unknown	zircon	135191	3897.29	3707.53	2517.75	6877.69	285.351	0.0414894	13932.8	519.076	0.0372558	2.02579	0.0557617	1.15617	0.0479686	0.209774	0.00740068
A	UT-FCT	shard	standard	apatite	146302	3830.19	3691.31	1804.02	1614.29	41.6599	0.0258069	2734.37	78.4325	0.0286839	1.69385	0.0385845	0.271369	0.00700319	0.225575	0.00719489
A	UT-FCT	grain	unknown	zircon	151858	3382.28	3735.7	2472.85	6376.29	789.65	0.123842	13080.1	1233.33	0.0942906	2.05136	0.155652	1.07188	0.132743	0.21411	0.00675848
A	UT-FCT	grain	unknown	zircon	168526	2247.16	3812.71	2554.04	6589.73	277.936	0.0421772	13268.3	556.149	0.0419157	2.01348	0.0594629	1.10776	0.0467222	0.223937	0.0142678
A	UT-FCT	grain	unknown	zircon	170007	2631.78	3778.17	1963.16	7074.09	405.493	0.0573208	14303.9	846.88	0.0592061	2.02202	0.0824078	1.18918	0.0681649	0.225805	0.00648681
A	UT-FCT	shard	standard	apatite	180378	2463.81	3780.54	1932.17	1615.98	63.2023	0.0391108	2741.85	97.3528	0.0355063	1.69671	0.0528238	0.271653	0.0106246	0.219206	0.0108561
A	UT-FCT	grain	unknown	zircon	184823	2119.03	3815.59	2530.64	6651.44	313.79	0.0471762	13079.5	981.371	0.0750312	1.96642	0.08863	1.11813	0.0527493	0.224563	0.0109846
A	UT-FCT	shard	standard	apatite	186675	2877.95	3770.01	2529.48	1307.82	144.186	0.110249	2093.54	308.322	0.147273	1.60078	0.183968	0.21985	0.0242383	0.218279	0.0168107
A	UT-FCT	grain	unknown	zircon	191860	2615.31	3789.41	2514.25	6340.43	558.366	0.0880643	12878.1	822.24	0.0638481	2.0311	0.108775	1.06585	0.0938635	0.205104	0.011835
A	UT-FCT	shard	standard	apatite	192601	3811.74	3716.65	2911.08	1516.52	67.9334	0.0447956	2584.95	77.3109	0.0299081	1.70453	0.0538622	0.254933	0.0114199	0.226883	0.00620094
A	UT-FCT	shard	standard	apatite	195564	3958.88	3708.67	2948.6	1526.44	60.7578	0.0398035	2591.33	81.0576	0.0312803	1.69763	0.0506239	0.256601	0.0102136	1.04957	0.0903515
A	UT-FCT	shard	standard	apatite	198897	3075.12	3760.76	2513.92	1319.51	164.503	0.12467	2156.99	379.656	0.176012	1.63469	0.215691	0.221815	0.0276536	0.22515	0.0059389
A	UT-FCT	grain	unknown	zircon	204083	2433.21	3797.65	2534.26	6416.85	432.907	0.0674641	12896.3	732.725	0.0568168	2.00975	0.0882018	1.0787	0.0727733	0.221696	0.0138255
A	UT-FCT	shard	standard	apatite	205564	3330.41	3751.72	2946.6	1500.49	48.8474	0.0325543	2503.94	83.3267	0.0332783	1.66874	0.0465535	0.252238	0.00821145	0.21013	0.0161226
A	CIT-DUR	shard	standard	apatite	220194	3208.79	3740.68	2157.04	1611.87	43.515	0.0269967	2724.95	82.7759	0.030377	1.69056	0.0406397	0.270961	0.00731505	0.157405	0.0255495
A	UT-FCT	shard	standard	apatite	237788	3141.96	3766.14	2913.99	1496.25	53.5454	0.0357863	2481.85	85.8226	0.0345801	1.65871	0.0497639	0.251526	0.00900119	0.902125	0.0821341
A	UT-FCT	shard	standard	apatite	243899	3170.06	3740.46	1879.87	1611.56	58.4964	0.0362979	2720.2	101.539	0.0373277	1.68793	0.0520662	0.27091	0.00983347	1.04537	0.0672345
A	UT-FCT	shard	standard	apatite	245010	3510.25	3743.11	2902.58	1515.96	46.466	0.0306511	2534.55	89.4172	0.0352794	1.6719	0.0467346	0.254839	0.00781111	1.08988	0.048436
A	CIT-DUR	shard	standard	apatite	246492	3686.42	3716.9	2127.25	1582.37	85.096	0.0537777	2725.46	86.9307	0.0318958	1.7224	0.0625251	0.266002	0.014305	0.946241	0.115833
A	UT-DUR	shard	standard	apatite	256492	2377.66	3779.96	1067.23	1546.81	55.5715	0.0359265	2586.94	81.658	0.0315655	1.67243	0.0478236	0.260025	0.00934178	1.05314	0.0982506
A	UT-FCT	shard	standard	apatite	281679	2970.35	3750.97	1915.27	1606.57	86.8349	0.0540499	2705.68	172.388	0.0637135	1.68413	0.0835512	0.27007	0.0145973	1.00391	0.0631404
A	CIT-DUR	shard	standard	apatite	303161	3411.36	3741.91	2151.19	1613.21	46.2226	0.0286525	2728.24	78.3756	0.0287275	1.69119	0.0405739	0.271187	0.00777019	0.229594	0.00972798
A	UT-DUR	shard	standard	apatite	305013	2511.13	3762.94	1299.7	1590.39	70.8177	0.0445286	2648.51	131.166	0.0495244	1.66532	0.0665993	0.26735	0.0119047	1.15315	0.0429617
A	UT-FCT	shard	standard	apatite	326495	2301.08	3797.47	1910.23	1597.69	75.2848	0.047121	2713.24	132.72	0.0489156	1.69823	0.06792	0.268578	0.0126557	0.190232	0.0184994
A	UT-DUR	shard	standard	apatite	411869	2031.63	3791.18	1137.69	1559.65	114.05	0.0731254	2637.31	203.112	0.0770149	1.69096	0.106201	0.262183	0.0191722	0.226312	0.00649152
A	UT-FCT	shard	standard	apatite	488910	2518.55	3808.35	2888.29	1493.1	74.8716	0.0501451	2478.13	142.993	0.0577022	1.65972	0.0764466	0.250996	0.0125862	1.01369	0.0685715
A	UT-FCT	shard	standard	apatite	523726	3502.99	3727.12	1862.07	1625.89	45.3443	0.027889	2741.27	74.9215	0.027331	1.68601	0.0390484	0.273318	0.00762256	0.924396	0.0856632
A	UT-FCT	grain	unknown	zircon	563357	2704.09	3796.79	2886.13	6279.35	645.363	0.102775	12681.2	1091.65	0.0860844	2.01951	0.134065	1.05558	0.108488	0.944218	0.0918563
A	CIT-DUR	shard	standard	apatite	668917	2870.03	3786	2203.47	1604.07	42.8734	0.0267279	2720.33	71.7555	0.0263775	1.69589	0.037552	0.269651	0.00720719	0.19857	0.012045
A	UT-DUR	shard	standard	apatite	757439	1961.33	3813.97	1362.53	1587.24	77.6726	0.0489357	2678.6	167.044	0.0623624	1.68759	0.0792703	0.266821	0.0130571	1.08258	0.102077
A	UT-FCT	shard	standard	apatite	784663	2309.53	3825.77	2914.97	1513.63	106.595	0.0704232	2538.85	194.798	0.0767268	1.67733	0.104146	0.254447	0.017919	1.01954	0.077791
A	SL1	shard	standard	zircon	914483	3559.07	3717.73	1482.11	5357.25	526.016	0.0981878	10899.7	992.368	0.0910451	2.03458	0.133903	0.900574	0.0884253	0.228213	0.00965875
A	SL1	shard	standard	zircon	1.6497e+06	3936.66	3707.07	1551.15	6218.01	432.861	0.0696141	12630.4	812.347	0.0643167	2.03127	0.0947774	1.04527	0.0727656	0.207712	0.0169297
A	SL1	shard	standard	zircon	1.98564e+06	2486.5	3822.11	1658.25	6453.79	285.243	0.0441977	13168.3	585.218	0.0444416	2.04039	0.0626776	1.08491	0.0479504	0.178128	0.0151838
A	SL1	shard	standard	zircon	1.98675e+06	2767.47	3785.1	1497.85	5966.51	412.771	0.0691812	12129.6	762.88	0.0628942	2.03294	0.0934972	1.00299	0.0693883	1.11483	0.0556421
A	UT-DUR	shard	standard	apatite	2.04879e+06	2608.21	3764.61	869.225	1415.76	105.062	0.0742093	2298.44	223.515	0.0972461	1.62347	0.122327	0.237994	0.0176614	1.09816	0.0460301
A	SL1	shard	standard	zircon	2.80049e+06	3163.07	3796.71	1458.45	6047.46	407.24	0.0673407	12247.7	828.501	0.0676455	2.02526	0.0954499	1.0166	0.0684587	0.210417	0.00553523
A	SL1	shard	standard	zircon	2.90679e+06	3813.11	3711.18	901.675	5545.82	463.505	0.0835773	11168.8	1035.01	0.0926694	2.01392	0.124791	0.932274	0.0779169	0.167989	0.0266664
A	SL1	shard	standard	zircon	3.73145e+06	3116.19	3757.92	1022.24	5674.93	480.058	0.0845927	11408.3	1109.83	0.0972829	2.0103	0.128918	0.953977	0.0806995	0.231184	0.00651494
A	SL1	shard	standard	zircon	1.35393e+07	3394.45	3766.33	987.534	6100.29	460.736	0.0755269	12318.3	939.893	0.0763003	2.0193	0.107359	1.02548	0.0774514	0.229533	0.0114793
B	USC-FCT1	grain	unknown	apatite	32594	3302.97	3687.72	2126.1	1551.64	127.693	0.0822956	2664.02	282.586	0.106075	1.71691	0.134255	0.264566	0.0217726	0.23828	0.00624592
B	USC-FCT1	grain	unknown	apatite	41112.8	2837.12	3692.67	1736.9	1580.84	42.5201	0.0268972	2690.46	72.2282	0.0268461	1.70192	0.0380022	0.269545	0.00724999	0.220691	0.00859279
B	UT-DUR	shard	standard	apatite	41483.2	2302.4	3705.74	3985.43	1536.4	43.825	0.0285245	2653.01	85.6165	0.0322714	1.72678	0.0430708	0.261967	0.0074725	1.03199	0.142122
B	UT-DUR	shard	standard	apatite	42224	2412.8	3726.09	3746.93	1542.14	44.1992	0.0286609	2647.75	70.1106	0.0264793	1.71693	0.0390205	0.262947	0.0075363	0.221196	0.00824284
B	UT-DUR	shard	standard	apatite	53520.8	3982.71	3742.73	3341.98	1607.87	50.2434	0.0312484	2781.27	85.6693	0.0308022	1.72979	0.0438775	0.274154	0.00856687	0.218113	0.0094815
B	USC-FCT1	grain	unknown	apatite	69077	2978.35	3702.44	1886.82	1651.23	45.0026	0.0272539	2833.01	77.3303	0.0272961	1.7157	0.0385727	0.281548	0.00767328	0.244007	0.00670213
B	UT-DUR	shard	standard	apatite	87966.7	4046.68	3741.7	3431.86	1597.4	113.719	0.0711899	2771.3	232.179	0.0837797	1.73488	0.109941	0.272369	0.0193899	1.09649	0.110859
B	USC-FCT2	grain	unknown	apatite	107042	4196.58	3823.86	614.467	1657.58	66.382	0.0400475	2822.65	111.633	0.0395491	1.70287	0.0562844	0.28263	0.0113186	0.212984	0.0135973
B	UT-DUR	shard	standard	apatite	112042	1767.17	3810.6	3461.42	1617.11	51.1342	0.0316208	2781.27	86.7941	0.0312067	1.7199	0.0444267	0.275729	0.00871877	1.1535	0.082099
B	USC-FCT1	grain	unknown	apatite	115560	3651.25	3688.9	1380.21	1649	42.9013	0.0260165	2827.42	74.114	0.0262126	1.71463	0.0369318	0.281167	0.00731499	0.239684	0.00667741
B	USC-FCT1	grain	unknown	apatite	116672	3000.7	3709.15	2428.53	1538.32	52.815	0.0343329	2618.71	101.962	0.0389359	1.70232	0.051911	0.262295	0.00900535	0.22284	0.00793431
B	USC-FCT1	grain	unknown	apatite	137598	4326.38	3736.28	1292.29	1687.34	47.2183	0.0279838	2895.38	79.5273	0.027467	1.71594	0.0392114	0.287705	0.00805108	0.243968	0.00649906
B	USC-FCT1	grain	unknown	apatite	141858	3277.12	3693.37	1603.93	1663.8	45.9984	0.0276465	2844.08	79.234	0.0278593	1.70939	0.0392488	0.283691	0.00784308	0.236155	0.0112121
B	UT-DUR	shard	standard	apatite	143710	3561.14	3730.53	2910.75	1559.28	57.2711	0.0367292	2644.22	94.1484	0.0356054	1.6958	0.0511545	0.265869	0.00976515	1.12417	0.136898
B	USC-FCT2	grain	unknown	apatite	144636	1032.8	3843.6	639.544	1672.68	54.2265	0.032419	2894.92	77.1177	0.026639	1.73071	0.0419598	0.285204	0.00924603	0.241282	0.00622533
B	USC-FCT1	grain	unknown	apatite	146117	3309.51	3705.24	1860.09	1637.66	70.2344	0.0428871	2802.21	133.043	0.0474779	1.71111	0.0639801	0.279233	0.0119755	0.214438	0.0153283
B	USC-FCT1	grain	unknown	apatite	147969	2271.43	3786.48	1984.51	1523.41	87.4482	0.0574028	2544.52	181.885	0.0714811	1.67028	0.0916768	0.259753	0.0149106	0.235249	0.00636787
B	USC-FCT1	grain	unknown	apatite	154266	3780.71	3701.83	1459.83	1617.44	47.3386	0.0292675	2791.46	75.561	0.0270686	1.72585	0.039866	0.275786	0.00807159	0.228823	0.00673618
B	USC-FCT1	grain	unknown	apatite	156303	3509.12	3680.79	1518.03	1600.95	44.1032	0.0275481	2715.21	79.9314	0.0294383	1.696	0.0403177	0.272974	0.00751994	0.248515	0.00779193
B	USC-FCT1	grain	unknown	apatite	167044	4583.68	3700.65	1212.95	1726.7	51.8112	0.030006	2948.87	92.4589	0.031354	1.70781	0.0433985	0.294415	0.00883421	0.221014	0.00859796
B	UT-DUR	shard	standard	apatite	169266	5001.42	3297.49	3494.04	1507.65	69.3442	0.0459949	2622.55	102.023	0.0389023	1.7395	0.0602405	0.257066	0.0118237	0.909386	0.168282
B	UT-DUR	shard	standard	apatite	229639	1099.79	3731.74	3654.75	1639.45	47.6374	0.0290569	2875.68	70.7717	0.0246104	1.75405	0.0380786	0.279539	0.00812254	0.961666	0.22667
B	USC-FCT2	grain	unknown	apatite	231491	2223.6	3883.04	389.793	1701.29	44.2013	0.0259811	2923.63	66.495	0.022744	1.71848	0.0345298	0.290082	0.00753666	0.250524	0.00692687
B	USC-FCT1	grain	unknown	zircon	234454	2014.39	3811.82	2685.84	6522.92	359.718	0.0551467	13305.4	620.754	0.0466542	2.0398	0.0722342	1.11221	0.0613346	0.242347	0.00596425
B	USC-FCT2	grain	unknown	apatite	250751	2876.16	3818.94	235.931	1675.19	47.0457	0.0280838	2865.98	75.3786	0.0263012	1.71084	0.0384766	0.285632	0.00802164	1.09226	0.188109
B	USC-FCT1	grain	unknown	apatite	252418	3014.33	3720.21	1710.3	1634.42	48.4197	0.0296249	2802.94	85.5347	0.030516	1.71494	0.0425307	0.278682	0.00825592	0.246388	0.00560384
B	USC-FCT1	grain	unknown	apatite	254640	3939.44	3720.16	1386.32	1640.67	42.4532	0.0258755	2796.47	71.3127	0.025501	1.70447	0.0363297	0.279747	0.00723859	1.12131	0.0523137
B	USC-FCT2	grain	unknown	apatite	257418	2620.24	3763.2	1249.16	1586.52	89.8551	0.0566365	2715.06	168.15	0.0619323	1.71133	0.0839244	0.270514	0.015321	1.19468	0.0699147
B	USC-FCT2	grain	unknown	apatite	270197	1938.37	3909.47	427.96	1666.79	51.0794	0.0306453	2854.01	79.5368	0.0278684	1.71228	0.041422	0.284201	0.00870943	0.220226	0.0130061
B	USC-FCT1	grain	unknown	apatite	289271	3898.02	3708.11	1762.03	1494.14	57.0051	0.0381524	2520.97	115.016	0.0456239	1.68724	0.0594739	0.254762	0.0097198	0.241529	0.00635249
B	USC-FCT1	grain	unknown	apatite	315754	2579.38	3735.81	2590	1573.95	43.6233	0.0277158	2667.38	70.6318	0.0264799	1.69471	0.0383321	0.26837	0.00743811	0.236217	0.00720839
B	USC-FCT2	grain	unknown	apatite	320754	3752.46	3867.39	203.964	1702.63	43.6545	0.0256395	2922.27	67.2377	0.0230087	1.71633	0.0344498	0.290311	0.00744342	0.227793	0.00949634
B	USC-FCT2	grain	unknown	apatite	341681	1694.24	3913.37	659.725	1700.43	45.2543	0.0266135	2913.08	73.1669	0.0251167	1.71314	0.0365941	0.289936	0.0077162	1.21227	0.176239
B	USC-FCT1	grain	unknown	zircon	343348	3547.1	3699.91	1907.92	7105.19	477.367	0.0671857	14482.6	1055.89	0.0729074	2.03832	0.0991434	1.21149	0.0813947	0.235671	0.00600984
B	USC-FCT1	grain	unknown	apatite	345385	3835.51	3698.44	1858.96	1634.02	56.669	0.0346807	2808.68	89.1184	0.0317297	1.71887	0.0470055	0.278613	0.00966249	0.22881	0.0141707
B	USC-FCT2	grain	unknown	apatite	397424	2425.83	3793.94	854.465	1621.81	49.8555	0.0307407	2799.61	86.0446	0.0307345	1.72623	0.0434695	0.276531	0.00850074	0.23716	0.0135574
B	UT-DUR	shard	standard	apatite	421684	3055.26	3707.66	3730.61	1520.46	44.613	0.0293417	2569.46	76.9716	0.0299563	1.68992	0.0419323	0.25925	0.00760685	0.217885	0.011473
B	USC-FCT2	grain	unknown	zircon	430574	2812.57	3745.41	1166.07	6756.19	513.751	0.0760415	13843.5	979.198	0.0707336	2.049	0.103854	1.15198	0.0875985	0.243896	0.00583932
B	USC-FCT1	grain	unknown	apatite	437241	4845.55	3536.96	1761.16	1673.1	76.4314	0.0456825	2912.55	143.235	0.0491786	1.74081	0.0671224	0.285277	0.0130321	0.240521	0.00670292
B	USC-FCT1	grain	unknown	apatite	449649	2515.45	3773.12	1775.84	1680.05	42.6247	0.0253711	2880.78	66.8194	0.0231949	1.7147	0.0343758	0.286461	0.00726783	0.212454	0.00969296
B	UT-DUR	shard	standard	apatite	526319	4660.43	3602.55	3355.07	1635.85	44.6674	0.0273053	2839.17	73.7378	0.0259716	1.73559	0.0376843	0.278925	0.00761612	0.297875	0.0164921
B	USC-FCT1	grain	unknown	titanite	532430	1712.67	3831	2823.01	2080.31	79.9304	0.0384224	3672.02	133.961	0.0364815	1.76513	0.0529828	0.354708	0.0136287	0.224792	0.00595246
B	USC-FCT2	grain	unknown	zircon	543356	2968.89	3748.23	1048.04	6840.72	455.771	0.0666261	13954	932.438	0.0668222	2.03985	0.0943623	1.16639	0.0777124	0.232098	0.00727914
B	USC-FCT1	grain	unknown	zircon	582802	3326.98	3711.61	2369.9	6601.03	384.627	0.0582678	13491.5	734.804	0.0544642	2.04385	0.0797589	1.12553	0.0655819	0.246273	0.00566643
B	USC-FCT2	grain	unknown	zircon	601507	806.684	3731.23	1310.97	7012.33	541.754	0.0772573	14211.5	1087.88	0.0765493	2.02665	0.108759	1.19566	0.0923732	0.228176	0.00864939
B	USC-FCT1	grain	unknown	apatite	645768	2286.6	3784.24	2673.26	1552.27	67.9627	0.0437828	2622.4	132.144	0.0503905	1.6894	0.0667543	0.264674	0.0115882	0.245498	0.00616611
B	UT-DUR	shard	standard	apatite	689659	4064.89	3711.4	2780.08	1559.4	47.8771	0.0307022	2636.59	74.3586	0.0282026	1.69077	0.0416895	0.26589	0.00816341	1.079	0.186672
B	USC-FCT2	grain	unknown	apatite	718178	3191.64	3833.81	231.996	1678.08	46.8121	0.0278962	2866.1	76.9901	0.0268623	1.70797	0.038727	0.286125	0.00798181	0.242192	0.0117847
B	USC-FCT1	grain	unknown	apatite	720586	1992.92	3825.53	2332.58	1501.49	78.6485	0.0523804	2527.26	161.345	0.063842	1.68317	0.0825803	0.256015	0.0134102	1.22052	0.0889849
B	USC-FCT2	grain	unknown	apatite	788737	3918.5	3880.62	365.279	1672.96	51.8561	0.0309966	2863.05	73.8696	0.0258011	1.71136	0.0403297	0.285252	0.00884186	1.21299	0.152362
B	USC-FCT2	grain	unknown	apatite	807441	913.455	3784.38	644.759	1722.73	53.3913	0.0309922	2972.72	82.1942	0.0276495	1.72558	0.0415333	0.293739	0.00910362	0.232578	0.00684046
B	USC-FCT2	grain	unknown	zircon	812997	3396.47	3791.5	467.436	6370.86	1004.8	0.157717	12960.8	2232.1	0.172219	2.03439	0.233525	1.08628	0.171325	0.239849	0.00635393
B	USC-FCT2	grain	unknown	zircon	826146	3415.98	3728.88	938.95	6972.41	402.318	0.0577013	14176	829.607	0.0585219	2.03316	0.0821842	1.18885	0.0685982	0.229107	0.00800515
B	USC-FCT1	grain	unknown	apatite	830220	2285.81	3796.65	2248.56	1548.8	70.7781	0.0456988	2613.19	154.331	0.0590582	1.68724	0.0746743	0.264082	0.0120682	0.2367	0.00751041
B	USC-FCT1	grain	unknown	apatite	836146	3883.11	3716.77	2382.21	1587.91	58.7738	0.0370132	2702.99	112.683	0.0416884	1.70223	0.0557486	0.270751	0.0100214	0.235936	0.00725137
B	USC-FCT2	grain	unknown	zircon	860592	2704.04	3775.47	736.094	7117.28	958.562	0.134681	14384.8	2091.24	0.145379	2.02111	0.198176	1.21355	0.163442	1.08311	0.157837
B	USC-FCT1	grain	unknown	apatite	881519	1634.93	3849.4	2424.74	1644.56	83.74	0.0509195	2814.13	160.872	0.0571659	1.71118	0.0765554	0.280409	0.0142783	0.21654	0.00648675
B	USC-FCT1	grain	unknown	apatite	925409	4102.87	3741.93	1329.39	1686.55	44.2732	0.0262507	2894.06	69.2893	0.0239419	1.71596	0.0355291	0.28757	0.00754891	1.16665	0.0825215
B	USC-FCT1	grain	unknown	apatite	969671	2823.62	3749.07	2530.61	1617.05	45.987	0.0284389	2754.07	86.3741	0.0313623	1.70315	0.0423363	0.275719	0.00784113	0.245453	0.0120711
B	UT-DUR	shard	standard	apatite	975412	3815.04	3742.54	2941.9	1598.31	56.4908	0.035344	2707.53	102.634	0.0379067	1.69399	0.0518278	0.272524	0.00963211	0.96693	0.212737
B	USC-FCT2	grain	unknown	apatite	1.00634e+06	3121.4	3757.21	573.831	1679.43	70.8026	0.0421588	2873.85	139.837	0.0486584	1.7112	0.0643817	0.286355	0.0120724	0.2039	0.0117979
B	USC-FCT2	grain	unknown	zircon	1.0093e+06	4405.88	3794.14	556.739	7243.96	806.097	0.111279	14393.3	1807.92	0.125609	1.98694	0.167811	1.23515	0.137446	1.1272	0.0970829
B	UT-DUR	shard	standard	apatite	1.01634e+06	1435.45	3810.02	3539.1	1595.18	50.4583	0.0316318	2759.77	81.1687	0.0294115	1.73007	0.0431926	0.27199	0.00860353	0.31359	0.0125793
B	USC-FCT2	grain	unknown	apatite	1.03764e+06	2586.5	3843.03	230.24	1667.54	44.7104	0.0268121	2846.05	75.3956	0.0264913	1.70673	0.0376919	0.284329	0.00762346	1.13996	0.177533
B	UT-DUR	shard	standard	apatite	1.05949e+06	4350.82	3706.37	2820.95	1599.53	53.7852	0.0336256	2718.58	94.9889	0.0349406	1.69962	0.0484925	0.272732	0.00917078	0.94765	0.278752
B	USC-FCT1	grain	unknown	zircon	1.0743e+06	4261.72	3705.91	2194.58	6320.29	863.283	0.136589	12852.2	1872.89	0.145726	2.03347	0.199731	1.07766	0.147196	0.242777	0.00563117
B	UT-DUR	shard	standard	apatite	1.08023e+06	2157.93	3764.18	3792.72	1459.24	71.6422	0.0490955	2419.47	139.993	0.0578611	1.65803	0.0758833	0.248812	0.0122155	0.940692	0.181584
B	USC-FCT2	grain	unknown	zircon	1.12708e+06	4064.01	3826.53	747.765	6637.9	536.62	0.0808419	13375.3	1151.98	0.0861274	2.015	0.118124	1.13181	0.0914978	1.1983	0.0990254
B	USC-FCT2	grain	unknown	zircon	1.26783e+06	3174.57	3738	1041.11	6653.4	968.477	0.145561	13526.7	2106.6	0.155736	2.03305	0.213171	1.13446	0.165133	0.225162	0.00586334
B	USC-FCT2	grain	unknown	zircon	1.35283e+06	1926.57	3887.11	1049.87	7021.84	514.735	0.0733048	14219.1	1175.03	0.082638	2.02498	0.110466	1.19728	0.0877662	1.13033	0.115261
B	UT-DUR	shard	standard	apatite	1.3895e+06	3770.1	3787.73	3583.31	1558.07	43.3369	0.0278145	2671.77	69.5742	0.0260405	1.7148	0.0381019	0.265662	0.00738926	1.14543	0.0969871
B	USC-FCT1	grain	unknown	zircon	1.43191e+06	3118.06	3719.85	2012.28	6586.12	653.932	0.0992894	13412.5	1367.68	0.101971	2.03648	0.142325	1.12298	0.1115	0.239269	0.00621422
B	USC-FCT2	grain	unknown	zircon	1.43191e+06	3542.17	3827.09	407.366	7138.54	443.146	0.062078	14333.1	906.418	0.0632396	2.00784	0.0886167	1.21718	0.0755598	1.20791	0.0763879
B	USC-FCT2	grain	unknown	zircon	1.47265e+06	1944.12	3867.68	1425.52	7157.51	323.953	0.0452606	14525.9	627.03	0.0431662	2.02947	0.0625447	1.22041	0.0552365	1.22417	0.0528426
B	USC-FCT2	grain	unknown	apatite	1.47673e+06	1339.15	3931.98	688.47	1713.89	51.8513	0.0302537	2946.77	86.166	0.0292409	1.71935	0.0420751	0.29223	0.00884104	0.248337	0.0072616
B	USC-FCT1	grain	unknown	zircon	1.52525e+06	4174.72	3743.43	1708.97	6493.38	823.356	0.126799	13180.8	1851.09	0.140439	2.02988	0.189212	1.10717	0.140388	0.309458	0.0112895
B	UT-DUR	shard	standard	apatite	1.64988e+06	2856.87	3716.47	3769.35	1526.18	77.9864	0.0510992	2589.84	154.748	0.059752	1.69695	0.0786221	0.260225	0.0132973	0.241991	0.00748023
B	USC-FCT2	grain	unknown	zircon	1.67007e+06	1611.7	3931.01	993.952	6784.21	761.527	0.11225	13749	1639.79	0.119266	2.02661	0.163782	1.15676	0.129846	1.1108	0.156
B	SL1	shard	standard	zircon	1.74211e+06	1276.85	3902.75	2005.91	6564.89	601.101	0.0915629	13406.1	1072.9	0.0800303	2.04209	0.121609	1.11936	0.102492	0.224509	0.0238148
B	SL1	shard	standard	zircon	1.88989e+06	994.271	3778.26	3213.12	5916.09	619.176	0.10466	12048.7	1207.44	0.100213	2.03661	0.144901	1.00874	0.105574	0.226737	0.006087
B	SL1	shard	standard	zircon	2.0775e+06	720.704	3713.97	2690.38	6076.97	667.768	0.109885	12245.6	1686.42	0.137716	2.01508	0.176183	1.03617	0.113859	0.223581	0.00721529
B	UT-DUR	shard	standard	apatite	2.13416e+06	3351.6	3742.96	2939.74	1564.76	53.1301	0.0339541	2624.71	97.8094	0.0372649	1.67739	0.0504138	0.266803	0.00905908	0.217449	0.00773574
B	UT-DUR	shard	standard	apatite	2.17176e+06	3057.52	3730.91	3088.88	1542.11	58.4903	0.0379287	2588.12	112.507	0.0434706	1.6783	0.0576912	0.262942	0.00997304	0.965679	0.201078
B	SL1	shard	standard	zircon	2.24213e+06	831.554	3788.05	2248.1	6360.66	708.325	0.11136	13010.9	1315.46	0.101104	2.04553	0.15041	1.08454	0.120775	0.223138	0.00590854
B	USC-FCT2	grain	unknown	zircon	2.4151e+06	686.036	3649.18	1405.48	6770.08	433.32	0.0640051	13687.4	974.185	0.0711736	2.02176	0.0957201	1.15435	0.0738843	0.218258	0.0130413
B	USC-FCT2	grain	unknown	zircon	2.46492e+06	2363.3	3812.72	1168.78	6573.62	715.056	0.108776	13339.4	1624.43	0.121777	2.02924	0.163285	1.12085	0.121922	1.15869	0.138192
B	SL1	shard	standard	zircon	2.48048e+06	1327.21	3826.58	3173.4	5358.06	932.327	0.174004	10790.8	1996.83	0.18505	2.01393	0.25401	0.91359	0.158969	0.234391	0.00721974
B	SL1	shard	standard	zircon	2.48733e+06	1128.59	3818	2680.05	5615.99	1272.14	0.226521	11411.1	2689.66	0.235705	2.0319	0.326908	0.957569	0.21691	0.238751	0.00651698
B	UT-DUR	shard	standard	apatite	2.88531e+06	2465.26	3769.38	3296.3	1534.79	64.1854	0.0418203	2585.42	136.138	0.052656	1.68454	0.0672428	0.261693	0.0109441	0.300286	0.0996486
B	USC-FCT1	grain	unknown	titanite	3.09865e+06	4521.16	3696.57	2165.87	2033.76	101.508	0.0499117	3534.57	195.695	0.0553659	1.73795	0.0745423	0.346772	0.017308	1.17597	0.0785807
B	USC-FCT1	grain	unknown	zircon	3.14624e+06	4683.58	3677.96	1580.05	6370.21	966.887	0.151783	12803.4	2215.04	0.173004	2.00989	0.230149	1.08617	0.164862	1.13699	0.0619253
B	SL1	shard	standard	zircon	3.19088e+06	1239.75	3843.29	2963.74	5703.87	1160.06	0.203382	11473.6	2524.33	0.220012	2.01154	0.299616	0.972553	0.197799	0.23355	0.0195668
B	USC-FCT1	grain	unknown	titanite	3.34292e+06	4740.65	3647.96	2047.06	2115.25	81.1687	0.0383731	3721.05	149.265	0.0401138	1.75915	0.0555123	0.360666	0.0138399	1.19767	0.091681
B	SL1	shard	standard	zircon	3.35903e+06	1210.65	3848.35	2305.8	5586.45	1500.21	0.268544	11244.8	3307.67	0.294151	2.01287	0.398297	0.952533	0.255797	0.237878	0.00940785
B	SL1	shard	standard	zircon	3.557e+06	821.11	3747.21	3013.95	5600.59	885.487	0.158106	11162.2	2154.67	0.193032	1.99305	0.249518	0.954942	0.150982	0.23439	0.00731453
B	USC-FCT2	grain	unknown	zircon	3.59552e+06	1168.91	3886.3	1224.2	6713.36	545.61	0.0812722	13591.6	1150.85	0.0846733	2.02456	0.117366	1.14468	0.0930306	1.12979	0.0904177
B	UT-DUR	shard	standard	apatite	3.6896e+06	4803.5	3567.69	2726.51	1671.95	50.4275	0.0301609	2871.46	88.7603	0.0309112	1.71743	0.0431878	0.28508	0.00859827	0.22166	0.00724603
B	UT-DUR	shard	standard	apatite	3.71905e+06	1925.05	3794.65	3877.03	1524.86	48.2971	0.0316732	2580.24	91.7922	0.035575	1.69212	0.0476316	0.26	0.00823502	1.03968	0.210009
B	USC-FCT1	grain	unknown	zircon	3.72553e+06	2728.85	3759.6	2067.09	5665.91	1085.47	0.19158	11458.7	2385.99	0.208225	2.0224	0.282949	0.966081	0.185082	0.221002	0.0111364
B	USC-FCT1	grain	unknown	titanite	3.99684e+06	3573.26	3718.78	2325.15	2038.3	552.417	0.271018	3563.19	1182.43	0.331846	1.74812	0.428454	0.347546	0.0941913	0.222198	0.00626654
B	UT-DUR	shard	standard	apatite	4.00054e+06	1700.35	3811	3899.15	1545.42	46.9034	0.03035	2630.21	85.9813	0.0326898	1.70194	0.0446066	0.263506	0.00799738	0.221673	0.00644798
B	USC-FCT1	grain	unknown	zircon	4.42e+06	4422.43	3748.93	1648.81	6129.22	1120.39	0.182795	12336.9	2491.96	0.201993	2.0128	0.272425	1.04508	0.191035	0.241539	0.00648831
B	UT-DUR	shard	standard	apatite	4.81335e+06	3427.58	3732.18	3803.11	1543.35	43.8187	0.0283919	2630.37	76.5116	0.0290878	1.70432	0.0406473	0.263153	0.00747142	0.320625	0.0220071
B	USC-FCT2	grain	unknown	titanite	5.59524e+06	3640.7	3807.25	747.603	2180.05	131.155	0.0601613	3804.53	261.135	0.0686381	1.74516	0.091272	0.371714	0.0223628	1.0154	0.101757
C	MG1	shard	standard	titanite	21112	1375.5	367.45	1042.12	1834.31	43.9917	0.0239827	3215.83	75.8122	0.0235747	1.75316	0.0336294	0.307007	0.00736286	0.270709	0.00638188
C	MG1	shard	standard	titanite	50002.1	552.817	389.9	1055.87	1840.84	44.9976	0.024444	3256.06	67.2074	0.0206407	1.76878	0.0319929	0.308101	0.00753123	0.274095	0.00565753
C	MG1	shard	standard	titanite	61113.7	2433.5	303.795	1028.5	1871.44	41.6479	0.0222545	3309.92	68.0252	0.0205519	1.76865	0.0302926	0.313222	0.00697059	0.278629	0.00572638
C	UT-DUR	shard	standard	apatite	83892.4	2490.24	311.182	1718.38	1645.19	43.5677	0.026482	2774.23	70.2022	0.0253052	1.68627	0.0366285	0.275354	0.00729191	0.982765	0.08542
C	UT-DUR	shard	standard	apatite	97411.5	1187.87	364.174	763.109	1649.15	48.1111	0.0291733	2792.41	90.144	0.0322817	1.69325	0.0435108	0.276017	0.00805233	1.10089	0.057635
C	MG1	shard	standard	titanite	152599	967.159	377.67	1152.97	1869.49	52.2194	0.0279325	3272.3	88.3412	0.0269967	1.75037	0.0388464	0.312896	0.00873994	0.233535	0.00590964
C	MG1	shard	standard	titanite	197231	1857.63	336.432	1128.71	1833.75	47.1177	0.0256947	3196.44	78.6785	0.0246144	1.74312	0.0355821	0.306915	0.00788607	0.235066	0.00758834
C	MG1	shard	standard	titanite	213898	1809.91	355.231	2058.49	1767.46	60.4899	0.0342242	3107.67	117.984	0.0379654	1.75827	0.0511142	0.295819	0.0101242	0.275463	0.00743658
C	MG1	shard	standard	titanite	222787	1328.11	380.462	2050.19	1742.07	51.5181	0.0295729	3055.54	92.1901	0.0301714	1.75397	0.0422477	0.29157	0.00862257	0.269077	0.00662317
C	UT-DUR	shard	standard	apatite	231491	2514.11	335.349	2778.97	1585.15	52.109	0.0328732	2664.63	86.6022	0.0325006	1.68099	0.046227	0.265306	0.00872147	1.01086	0.0604923
C	MG1	shard	standard	titanite	339459	853.732	399.755	2028.11	1775.66	50.3169	0.028337	3107.7	84.4902	0.0271874	1.75016	0.0392701	0.297192	0.00842152	0.261604	0.00993191
C	UT-DUR	shard	standard	apatite	348904	611.394	400.525	789.137	1665.87	47.6212	0.0285863	2792.52	71.5385	0.0256179	1.67631	0.0383856	0.278816	0.00797034	1.01007	0.0661775
C	UT-DUR	shard	standard	apatite	384275	2092.35	349.283	1751.59	1652.26	47.6971	0.0288678	2793.33	92.3467	0.0330597	1.69061	0.0438896	0.276539	0.00798305	1.0109	0.062754
C	UT-DUR	shard	standard	apatite	406869	1076.96	390.725	1743.31	1616.98	43.0711	0.0266367	2704.95	78.5251	0.0290301	1.67284	0.0393988	0.270633	0.00720879	0.254217	0.0104192
C	UT-DUR	shard	standard	apatite	418351	1830.04	373.933	2886.34	1558.35	40.9018	0.0262468	2624.9	84.0012	0.0320016	1.68441	0.0413884	0.26082	0.00684571	0.981767	0.112373
C	UT-DUR	shard	standard	apatite	422610	2891.34	300.716	1699.99	1666.24	41.5851	0.0249574	2822.46	74.3782	0.0263522	1.69391	0.0362948	0.278878	0.00696009	0.842494	0.0938047
C	UT-DUR	shard	standard	apatite	503540	1607.78	365.888	1724.72	1627.37	42.3647	0.0260327	2744.32	77.9883	0.028418	1.68636	0.0385394	0.272372	0.00709057	1.03133	0.0763005
C	UT-DUR	shard	standard	apatite	504651	2903.53	325.583	2761.97	1601.02	47.413	0.0296142	2688.22	80.5501	0.0299641	1.67906	0.0421289	0.267962	0.00793549	0.238245	0.00848343
C	MG1	shard	standard	titanite	572802	2274.78	334.702	2033.37	1691.61	48.6358	0.0287511	2960.33	96.9612	0.0327535	1.75	0.0435823	0.283124	0.00814015	0.257216	0.00776057
C	UT-DUR	shard	standard	apatite	580580	2189.37	354.744	2765.04	1582.96	48.3222	0.0305266	2676.03	97.9665	0.0366088	1.69053	0.0476663	0.264939	0.00808767	1.07076	0.054694
C	UT-DUR	shard	standard	apatite	609470	2232.49	351.947	805.226	1669.45	41.4206	0.0248109	2821.14	66.5001	0.023572	1.68986	0.0342232	0.279415	0.00693255	0.980248	0.0786547
C	MG1	shard	standard	titanite	678177	2095.33	386.281	3237.17	1533.1	44.3718	0.0289425	2616.57	85.6465	0.0327324	1.70672	0.043693	0.256594	0.00742649	0.224309	0.00729018
C	MG1	shard	standard	titanite	738364	2482.41	353.521	3228.89	1667.98	41.6046	0.0249431	2935.83	79.5873	0.027109	1.76011	0.0368382	0.279169	0.00696334	0.261607	0.0071124
C	UT-DUR	shard	standard	apatite	762069	2745.42	303.815	756.962	1669.17	47.3314	0.0283562	2821.88	79.8047	0.0282807	1.69058	0.0400484	0.279369	0.00792183	0.236471	0.00943873
C	UT-DUR	shard	standard	apatite	859110	1382.74	405.076	2882.92	1556.89	43.8789	0.0281838	2606.19	79.1813	0.030382	1.67398	0.0414414	0.260575	0.007344	0.994037	0.0479001
C	UT-DUR	shard	standard	apatite	910779	1737.44	359.506	786.782	1660.59	45.7097	0.0275261	2801.17	74.2927	0.0265221	1.68684	0.0382244	0.277933	0.0076504	0.915342	0.0940847
C	SL1	shard	standard	zircon	929113	1284	396.424	1409.42	6264.94	418.669	0.0668273	12693.6	901.947	0.0710554	2.02613	0.0975436	1.04856	0.0700724	0.237596	0.00626117
C	MG1	shard	standard	titanite	1.14153e+06	1131.59	425.031	3198.79	1659.89	54.2782	0.0327	2890.82	102.706	0.0355283	1.74158	0.0482861	0.277814	0.00908451	0.235075	0.00602213
C	SL1	shard	standard	zircon	1.87638e+06	3243.94	324.685	2471.5	5908.47	411.76	0.0696897	11674.5	1014.73	0.0869181	1.9759	0.111407	0.988899	0.0689161	0.231018	0.00656507
C	SL1	shard	standard	zircon	1.95527e+06	807.792	408.289	489.92	6600.13	295.066	0.0447061	13077.8	684.663	0.0523532	1.98144	0.068844	1.10466	0.0493851	0.226295	0.00678072
C	SL1	shard	standard	zircon	2.05638e+06	3087.84	330.269	1390.17	6008.91	341.394	0.0568146	12008.3	718.605	0.0598425	1.99841	0.0825168	1.00571	0.057139	0.249201	0.00816221
C	SL1	shard	standard	zircon	2.50177e+06	2729.21	346.533	1350.55	5991.34	363.009	0.060589	11998.8	786.141	0.0655181	2.0027	0.0892392	1.00277	0.0607567	0.225269	0.00824683
C	SL1	shard	standard	zircon	2.5114e+06	2559.65	348.888	480.626	6072.17	329.455	0.0542565	12008.8	745.473	0.0620774	1.97767	0.0824462	1.0163	0.0551407	0.237484	0.00559799
C	MG1	shard	standard	titanite	2.51585e+06	2713.41	356.263	1994.41	1729.09	59.0274	0.0341379	3019.92	123.773	0.0409855	1.74654	0.0533405	0.289397	0.00987939	0.235143	0.00777376
C	SL1	shard	standard	zircon	2.68548e+06	1447.15	387.295	604.787	5883.56	592.488	0.100702	11662.7	1334.91	0.11446	1.98225	0.152453	0.984728	0.0991644	0.220263	0.00720974
C	SL1	shard	standard	zircon	2.95364e+06	2762.5	342.531	2466.89	5142.73	472.973	0.0919693	10008.2	1114.33	0.111342	1.94609	0.144414	0.860737	0.0791613	0.247138	0.00669967
C	SL1	shard	standard	zircon	2.96605e+06	3174.89	324.785	435.689	6208.56	405.76	0.0653549	12251.4	906.396	0.0739829	1.97331	0.0987154	1.03912	0.0679118	0.237546	0.00671797
C	MG1	shard	standard	titanite	3.11384e+06	1549.38	414.636	3165.38	1633.79	53.7534	0.0329012	2830.18	100.777	0.035608	1.73229	0.0484811	0.273446	0.00899669	0.227703	0.00661025
C	SL1	shard	standard	zircon	3.28921e+06	1901.71	385.619	1438.99	6320.23	299.014	0.0473106	12719.9	649.726	0.0510794	2.01257	0.0696233	1.05781	0.0500458	0.21939	0.0066655
C	SL1	shard	standard	zircon	3.37681e+06	2276.15	394.602	2434.51	5840.81	395.877	0.0677777	11644.6	934.362	0.0802396	1.99367	0.105034	0.977573	0.0662577	0.235803	0.00625397
C	MG1	shard	standard	titanite	3.91961e+06	610.301	467.479	3353.84	1620.56	56.5642	0.0349041	2809.1	112.125	0.039915	1.73342	0.0530236	0.271232	0.00946712	0.220965	0.00707123
C	SL1	shard	standard	zircon	6.81177e+06	1360.61	442.288	2468.11	5928.04	245.363	0.0413902	11808.4	569.019	0.0481874	1.99196	0.063523	0.992174	0.0410662	1.06855	0.075926
C	SL1	shard	standard	zircon	7.23512e+06	1963.88	359.051	445.054	5502.54	519.36	0.0943854	10873.6	1117.66	0.102786	1.97611	0.139548	0.920958	0.086925	0.24335	0.0086458
* = normalized by average grayscale value of SL1 zircon standards in same scan

## Sheet: RSDs
Mount	Sample	Grain/shard	Type	Mineral	Volume	X-position	Y-position	Z-position	RSDs at 130 kV					RSDs at 60 kV
					[µm³]	[µm]	[µm]	[µm]	18 s	4 min	17 min	68 min	125 min	18 s	4 min	17 min	68 min	125 min
A	UT-DUR	shard	standard	apatite	10741.2	2277.43	3766.64	748.498	0.239701	0.120034	0.055716	0.0267312	0.0737321	0.173571	0.0751736	0.0432719	0.0310987	0.0595938
A	UT-DUR	shard	standard	apatite	30371.7	2154.89	3767.65	974.828	0.371875	0.188957	0.191509	0.203754	0.233221	0.459534	0.185786	0.251459	0.162317	0.249194
A	SL1	shard	standard	zircon	34075.5	3852.62	3671.26	1424.77	0.218518	0.114693	0.0968499	0.144128	0.111452	0.282982	0.166826	0.0968492	0.122413	0.124593
A	UT-DUR	shard	standard	apatite	51298.5	2229.17	3792.97	1304.07	0.236906	0.0973004	0.0629473	0.0327968	0.0748101	0.19005	0.0793022	0.0447305	0.0423704	0.0685087
A	UT-DUR	shard	standard	apatite	70373.3	2392.05	3774.94	1403.59	0.229238	0.12066	0.0695672	0.0464463	0.0966977	0.264561	0.0992826	0.0647977	0.0606586	0.0991952
A	UT-FCT	shard	standard	apatite	72595.7	3306.83	3722.76	1842.86	0.242243	0.0929622	0.0500614	0.0276165	0.0762741	0.188823	0.126418	0.0424096	0.0318144	0.0673932
A	UT-FCT	shard	standard	apatite	80188.6	2787.01	3761.89	1966.58	0.220566	0.100686	0.0516809	0.0290076	0.0787173	0.203376	0.081394	0.0449232	0.033096	0.0711208
A	UT-FCT	shard	standard	apatite	80559	3994.59	3680.03	1866.19	0.231765	0.0953598	0.0550102	0.0347538	0.0795	0.239153	0.138379	0.0447077	0.0423235	0.0649562
A	UT-DUR	shard	standard	apatite	90189	2192.34	3772.85	1169.82	0.25809	0.114211	0.0598202	0.0650536	0.088753	0.403405	0.115642	0.0852543	0.0815056	0.125353
A	UT-FCT	shard	standard	apatite	93522.5	3749.67	3711.78	2490.75	0.240155	0.120188	0.0800106	0.0718355	0.123709	0.271754	0.117927	0.0947452	0.0852413	0.120816
A	UT-FCT	grain	unknown	zircon	95930	2036.93	3826	2891.95	0.0946598	0.0836576	0.0695397	0.0589555	0.0558368	0.0988942	0.145235	0.0318933	0.0499107	0.0371383
A	UT-FCT	shard	standard	apatite	100004	3657.97	3725.74	2946.07	0.221215	0.100004	0.049597	0.0274478	0.0805317	0.237424	0.232316	0.042302	0.0263061	0.071668
A	UT-FCT	shard	standard	apatite	102041	3223.86	3739.6	2499.76	0.255909	0.147727	0.131342	0.122004	0.179124	0.29967	0.189843	0.18056	0.158739	0.21395
A	UT-FCT	shard	standard	apatite	104078	3684.32	3701.91	1822.02	0.223116	0.102037	0.046215	0.0294069	0.0760559	0.191142	0.121614	0.0423828	0.0281808	0.0640025
A	CIT-DUR	shard	standard	apatite	110190	3866.43	3693.55	2195.94	0.20721	0.100329	0.0518562	0.0806333	0.0763672	0.240962	0.204558	0.0487859	0.0500116	0.070373
A	UT-FCT	shard	standard	apatite	115560	2907.25	3770.82	2879.42	0.235901	0.105307	0.0682117	0.0509694	0.101072	0.231541	0.212681	0.0705525	0.0602097	0.0969677
A	UT-FCT	shard	standard	apatite	120746	2167.21	3797.63	1866.44	0.214075	0.101269	0.0483484	0.0332115	0.0772749	0.182602	0.0818951	0.042725	0.0292614	0.0656637
A	SL1	shard	standard	zircon	121301	2262.68	3799.38	1615.51	0.107678	0.0801917	0.0527791	0.0497085	0.0652807	0.132957	0.0823271	0.041611	0.0497539	0.0780346
A	UT-FCT	grain	unknown	zircon	121857	2161.01	3820.79	2881.84	0.10875	0.0892399	0.0865342	0.0691282	0.0789841	0.0959145	0.164631	0.0425975	0.0607851	0.0686147
A	UT-FCT	grain	unknown	zircon	132228	2718.8	3782.55	2543.59	0.0701484	0.0510205	0.0376457	0.0455921	0.0452591	0.0784867	0.105153	0.0378721	0.0380862	0.0480918
A	UT-FCT	grain	unknown	zircon	134265	3564.02	3723.95	2511.71	0.101532	0.101737	0.0907443	0.0929936	0.0913968	0.214551	0.186686	0.083182	0.0932934	0.0975691
A	UT-FCT	grain	unknown	zircon	135191	3897.29	3707.53	2517.75	0.136573	0.0627158	0.0406098	0.0414894	0.03711	0.147544	0.181177	0.0239605	0.0372558	0.0535236
A	UT-FCT	shard	standard	apatite	146302	3830.19	3691.31	1804.02	0.217134	0.0941843	0.0466331	0.0258069	0.076094	0.209705	0.117711	0.0410708	0.0286839	0.061088
A	UT-FCT	grain	unknown	zircon	151858	3382.28	3735.7	2472.85	0.118528	0.111983	0.116921	0.123842	0.0760159	0.200348	0.232122	0.0796714	0.0942906	0.104556
A	UT-FCT	grain	unknown	zircon	168526	2247.16	3812.71	2554.04	0.0923473	0.0529369	0.0390387	0.0421772	0.0539954	0.0685397	0.13189	0.0369041	0.0419157	0.047612
A	UT-FCT	grain	unknown	zircon	170007	2631.78	3778.17	1963.16	0.0832675	0.0700628	0.0688999	0.0573208	0.049111	0.0885928	0.0622193	0.0411355	0.0592061	0.0495105
A	UT-FCT	shard	standard	apatite	180378	2463.81	3780.54	1932.17	0.219812	0.100279	0.053274	0.0391108	0.0774749	0.218214	0.0768617	0.047803	0.0355063	0.0694138
A	UT-FCT	grain	unknown	zircon	184823	2119.03	3815.59	2530.64	0.119289	0.0854322	0.0675147	0.0471762	0.0749941	0.112357	0.203009	0.0604461	0.0750312	0.0644143
A	UT-FCT	shard	standard	apatite	186675	2877.95	3770.01	2529.48	0.28104	0.151548	0.121098	0.110249	0.170351	0.277384	0.183478	0.16589	0.147273	0.223741
A	UT-FCT	grain	unknown	zircon	191860	2615.31	3789.41	2514.25	0.120566	0.0775156	0.0616625	0.0880643	0.0729814	0.0956931	0.163308	0.0472644	0.0638481	0.0810592
A	UT-FCT	shard	standard	apatite	192601	3811.74	3716.65	2911.08	0.222456	0.109498	0.0499534	0.0447956	0.0797523	0.26866	0.257285	0.0434769	0.0299081	0.0693892
A	UT-FCT	shard	standard	apatite	195564	3958.88	3708.67	2948.6	0.223796	0.108116	0.0479381	0.0398035	0.0765057	0.305213	0.200568	0.0412165	0.0312803	0.0642108
A	UT-FCT	shard	standard	apatite	198897	3075.12	3760.76	2513.92	0.278042	0.156315	0.137302	0.12467	0.18446	0.291743	0.19411	0.1898	0.176012	0.23366
A	UT-FCT	grain	unknown	zircon	204083	2433.21	3797.65	2534.26	0.10329	0.0655209	0.0470615	0.0674641	0.0517102	0.0677099	0.148443	0.0385475	0.0568168	0.0486226
A	UT-FCT	shard	standard	apatite	205564	3330.41	3751.72	2946.6	0.237533	0.102229	0.0538895	0.0325543	0.0819593	0.221047	0.219083	0.0509814	0.0332783	0.072937
A	CIT-DUR	shard	standard	apatite	220194	3208.79	3740.68	2157.04	0.223473	0.103507	0.0462757	0.0269967	0.0753033	0.207842	0.175311	0.0417664	0.030377	0.0652791
A	UT-FCT	shard	standard	apatite	237788	3141.96	3766.14	2913.99	0.235283	0.100857	0.0540608	0.0357863	0.0833748	0.188529	0.208475	0.0536551	0.0345801	0.0763284
A	UT-FCT	shard	standard	apatite	243899	3170.06	3740.46	1879.87	0.216763	0.0967401	0.0548714	0.0362979	0.0803877	0.199959	0.106087	0.0485124	0.0373277	0.0719102
A	UT-FCT	shard	standard	apatite	245010	3510.25	3743.11	2902.58	0.225972	0.104968	0.0551712	0.0306511	0.0815611	0.224899	0.213409	0.0489563	0.0352794	0.0699897
A	CIT-DUR	shard	standard	apatite	246492	3686.42	3716.9	2127.25	0.224064	0.0935757	0.0474326	0.0537777	0.0739071	0.20657	0.148998	0.0415911	0.0318958	0.0714429
A	UT-DUR	shard	standard	apatite	256492	2377.66	3779.96	1067.23	0.232509	0.101496	0.0522707	0.0359265	0.0839833	0.230017	0.0881424	0.049261	0.0315655	0.0758223
A	UT-FCT	shard	standard	apatite	281679	2970.35	3750.97	1915.27	0.233259	0.102649	0.0694961	0.0540499	0.0941791	0.211184	0.120913	0.0720124	0.0637135	0.0882281
A	CIT-DUR	shard	standard	apatite	303161	3411.36	3741.91	2151.19	0.215589	0.0933726	0.0466355	0.0286525	0.0748839	0.214334	0.132305	0.0410608	0.0287275	0.0672894
A	UT-DUR	shard	standard	apatite	305013	2511.13	3762.94	1299.7	0.229193	0.0999562	0.0670121	0.0445286	0.0902093	0.204106	0.0869366	0.0555087	0.0495244	0.083524
A	UT-FCT	shard	standard	apatite	326495	2301.08	3797.47	1910.23	0.240711	0.102789	0.0619462	0.047121	0.0921803	0.20062	0.0897154	0.066946	0.0489156	0.0891954
A	UT-DUR	shard	standard	apatite	411869	2031.63	3791.18	1137.69	0.244119	0.112904	0.0650979	0.0731254	0.0935556	0.38762	0.114594	0.0812148	0.0770149	0.0901479
A	UT-FCT	shard	standard	apatite	488910	2518.55	3808.35	2888.29	0.222772	0.108852	0.0619234	0.0501451	0.0982385	0.222485	0.121548	0.0682677	0.0577022	0.0926787
A	UT-FCT	shard	standard	apatite	523726	3502.99	3727.12	1862.07	0.233916	0.0955578	0.0480891	0.027889	0.0760837	0.194915	0.11825	0.0421023	0.027331	0.0621468
A	UT-FCT	grain	unknown	zircon	563357	2704.09	3796.79	2886.13	0.120631	0.121462	0.102029	0.102775	0.0788538	0.135225	0.232098	0.0826537	0.0860844	0.0992664
A	CIT-DUR	shard	standard	apatite	668917	2870.03	3786	2203.47	0.221286	0.0976023	0.0481059	0.0267279	0.0767075	0.18575	0.114646	0.0410442	0.0263775	0.0631464
A	UT-DUR	shard	standard	apatite	757439	1961.33	3813.97	1362.53	0.229344	0.122616	0.0734608	0.0489357	0.0973103	0.338212	0.110864	0.0656709	0.0623624	0.0918581
A	UT-FCT	shard	standard	apatite	784663	2309.53	3825.77	2914.97	0.232363	0.113636	0.080547	0.0704232	0.111015	0.207521	0.131384	0.0896037	0.0767268	0.110639
A	SL1	shard	standard	zircon	914483	3559.07	3717.73	1482.11	0.128588	0.0837354	0.0776793	0.0981878	0.0871489	0.118868	0.103253	0.0870386	0.0910451	0.0925874
A	SL1	shard	standard	zircon	1.6497e+06	3936.66	3707.07	1551.15	0.115603	0.0784919	0.0676138	0.0696141	0.0680121	0.163567	0.0880918	0.0594586	0.0643167	0.0712753
A	SL1	shard	standard	zircon	1.98564e+06	2486.5	3822.11	1658.25	0.0801038	0.0515893	0.0417739	0.0441977	0.0458433	0.0750423	0.0472062	0.0431187	0.0444416	0.0483742
A	SL1	shard	standard	zircon	1.98675e+06	2767.47	3785.1	1497.85	0.0993713	0.0823148	0.0599305	0.0691812	0.0640371	0.0852952	0.0706885	0.0610419	0.0628942	0.0686907
A	UT-DUR	shard	standard	apatite	2.04879e+06	2608.21	3764.61	869.225	0.257993	0.126321	0.0880169	0.0742093	0.119219	0.286879	0.126975	0.108027	0.0972461	0.127745
A	SL1	shard	standard	zircon	2.80049e+06	3163.07	3796.71	1458.45	0.0969823	0.0724849	0.0661286	0.0673407	0.0699471	0.0912935	0.069482	0.0680349	0.0676455	0.0734222
A	SL1	shard	standard	zircon	2.90679e+06	3813.11	3711.18	901.675	0.152106	0.0896926	0.0875717	0.0835773	0.0931335	0.121331	0.0986687	0.0921068	0.0926694	0.102648
A	SL1	shard	standard	zircon	3.73145e+06	3116.19	3757.92	1022.24	0.123852	0.0937794	0.087721	0.0845927	0.0931117	0.121118	0.10177	0.0983801	0.0972829	0.1101
A	SL1	shard	standard	zircon	1.35393e+07	3394.45	3766.33	987.534	0.114702	0.0851368	0.0749574	0.0755269	0.0816768	0.104404	0.0799342	0.0750188	0.0763003	0.0870014
B	USC-FCT1	grain	unknown	apatite	32594	3302.97	3687.72	2126.1	0.312715	0.117469	0.0814242	0.0822956	0.124118	0.213797	0.128524	0.110562	0.106075	0.135563
B	USC-FCT1	grain	unknown	apatite	41112.8	2837.12	3692.67	1736.9	0.220853	0.0827927	0.0475264	0.0268972	0.0698076	0.186418	0.0729027	0.046304	0.0268461	0.0554863
B	UT-DUR	shard	standard	apatite	41483.2	2302.4	3705.74	3985.43	0.244171	0.10228	0.0502888	0.0285245	0.0785859	0.173486	0.0774216	0.0439011	0.0322714	0.0675669
B	UT-DUR	shard	standard	apatite	42224	2412.8	3726.09	3746.93	0.238321	0.0881956	0.04594	0.0286609	0.0778554	0.186347	0.064193	0.0391461	0.0264793	0.0604231
B	UT-DUR	shard	standard	apatite	53520.8	3982.71	3742.73	3341.98	0.218487	0.0963278	0.0476811	0.0312484	0.075215	0.167209	0.0795414	0.0419935	0.0308022	0.0667574
B	USC-FCT1	grain	unknown	apatite	69077	2978.35	3702.44	1886.82	0.215188	0.0889676	0.0462227	0.0272539	0.0731013	0.167891	0.0721405	0.0372633	0.0272961	0.0623735
B	UT-DUR	shard	standard	apatite	87966.7	4046.68	3741.7	3431.86	0.240356	0.121435	0.0735798	0.0711899	0.112735	0.180614	0.10681	0.0995035	0.0837797	0.109799
B	USC-FCT2	grain	unknown	apatite	107042	4196.58	3823.86	614.467	0.217828	0.0919178	0.0628648	0.0400475	0.0799289	0.178105	0.0798677	0.0497386	0.0395491	0.0699468
B	UT-DUR	shard	standard	apatite	112042	1767.17	3810.6	3461.42	0.246154	0.0931554	0.0502878	0.0316208	0.0768511	0.173136	0.0820412	0.0386693	0.0312067	0.065879
B	USC-FCT1	grain	unknown	apatite	115560	3651.25	3688.9	1380.21	0.240322	0.0890393	0.045509	0.0260165	0.0714284	0.169441	0.0758685	0.0428541	0.0262126	0.0594707
B	USC-FCT1	grain	unknown	apatite	116672	3000.7	3709.15	2428.53	0.237405	0.0938645	0.053243	0.0343329	0.0822864	0.195275	0.083024	0.0541635	0.0389359	0.0680271
B	USC-FCT1	grain	unknown	apatite	137598	4326.38	3736.28	1292.29	0.219662	0.0917336	0.0488453	0.0279838	0.0716224	0.206654	0.077712	0.0383946	0.027467	0.0642109
B	USC-FCT1	grain	unknown	apatite	141858	3277.12	3693.37	1603.93	0.226352	0.0897515	0.0458028	0.0276465	0.0752861	0.169456	0.0765635	0.0418989	0.0278593	0.0630789
B	UT-DUR	shard	standard	apatite	143710	3561.14	3730.53	2910.75	0.253874	0.0927565	0.0481387	0.0367292	0.0757964	0.17569	0.0780216	0.046686	0.0356054	0.0651574
B	USC-FCT2	grain	unknown	apatite	144636	1032.8	3843.6	639.544	0.23355	0.142697	0.048122	0.032419	0.0710447	0.177654	0.0758719	0.0401808	0.026639	0.0612183
B	USC-FCT1	grain	unknown	apatite	146117	3309.51	3705.24	1860.09	0.218549	0.0938075	0.0596195	0.0428871	0.0866242	0.190349	0.0786182	0.0571164	0.0474779	0.0753594
B	USC-FCT1	grain	unknown	apatite	147969	2271.43	3786.48	1984.51	0.249484	0.10999	0.0701987	0.0574028	0.10283	0.207467	0.107164	0.0792132	0.0714811	0.103723
B	USC-FCT1	grain	unknown	apatite	154266	3780.71	3701.83	1459.83	0.226936	0.0913177	0.0505745	0.0292675	0.0753494	0.182142	0.0711444	0.0425504	0.0270686	0.0610127
B	USC-FCT1	grain	unknown	apatite	156303	3509.12	3680.79	1518.03	0.247574	0.0948668	0.0489595	0.0275481	0.0774376	0.191306	0.0778803	0.0430956	0.0294383	0.0688964
B	USC-FCT1	grain	unknown	apatite	167044	4583.68	3700.65	1212.95	0.217676	0.102464	0.0523989	0.030006	0.0709493	0.172699	0.0764755	0.0420177	0.031354	0.0672496
B	UT-DUR	shard	standard	apatite	169266	5001.42	3297.49	3494.04	0.413786	0.289234	0.263208	0.0459949	0.0844183	0.201631	0.0866882	0.0513297	0.0389023	0.0830874
B	UT-DUR	shard	standard	apatite	229639	1099.79	3731.74	3654.75	0.247464	0.12382	0.0468188	0.0290569	0.0729596	0.182811	0.0720546	0.0351077	0.0246104	0.0535563
B	USC-FCT2	grain	unknown	apatite	231491	2223.6	3883.04	389.793	0.209317	0.0864549	0.0433117	0.0259811	0.0690617	0.155667	0.0653221	0.0355252	0.022744	0.0554737
B	USC-FCT1	grain	unknown	zircon	234454	2014.39	3811.82	2685.84	0.0913344	0.0670433	0.0550147	0.0551467	0.0536518	0.070693	0.0717598	0.0430363	0.0466542	0.0523559
B	USC-FCT2	grain	unknown	apatite	250751	2876.16	3818.94	235.931	0.217468	0.0880899	0.0450599	0.0280838	0.0703943	0.173385	0.0709004	0.0379218	0.0263012	0.0575281
B	USC-FCT1	grain	unknown	apatite	252418	3014.33	3720.21	1710.3	0.21968	0.0914508	0.0453584	0.0296249	0.0712323	0.17583	0.0706501	0.0438225	0.030516	0.0607455
B	USC-FCT1	grain	unknown	apatite	254640	3939.44	3720.16	1386.32	0.213295	0.0899944	0.0442926	0.0258755	0.0722091	0.178999	0.0729596	0.0400879	0.025501	0.0613704
B	USC-FCT2	grain	unknown	apatite	257418	2620.24	3763.2	1249.16	0.236551	0.103404	0.0645893	0.0566365	0.0940687	0.193316	0.0981928	0.0757803	0.0619323	0.0948804
B	USC-FCT2	grain	unknown	apatite	270197	1938.37	3909.47	427.96	0.213887	0.0888215	0.0510891	0.0306453	0.0709152	0.168251	0.0685394	0.0399403	0.0278684	0.0598839
B	USC-FCT1	grain	unknown	apatite	289271	3898.02	3708.11	1762.03	0.260962	0.103681	0.0567217	0.0381524	0.0868189	0.202184	0.087898	0.0547806	0.0456239	0.0791386
B	USC-FCT1	grain	unknown	apatite	315754	2579.38	3735.81	2590	0.23674	0.0918104	0.0483542	0.0277158	0.0755743	0.18319	0.0757281	0.0412115	0.0264799	0.0600237
B	USC-FCT2	grain	unknown	apatite	320754	3752.46	3867.39	203.964	0.193376	0.0875498	0.0421309	0.0256395	0.0676795	0.164433	0.065324	0.0362978	0.0230087	0.0562051
B	USC-FCT2	grain	unknown	apatite	341681	1694.24	3913.37	659.725	0.236042	0.0923563	0.0451934	0.0266135	0.070028	0.172062	0.0710192	0.0390753	0.0251167	0.0609747
B	USC-FCT1	grain	unknown	zircon	343348	3547.1	3699.91	1907.92	0.0948614	0.0774502	0.0700656	0.0671857	0.0808607	0.0932514	0.0847584	0.073109	0.0729074	0.0949303
B	USC-FCT1	grain	unknown	apatite	345385	3835.51	3698.44	1858.96	0.231844	0.0940106	0.0500976	0.0346807	0.0742664	0.179161	0.0748014	0.0447556	0.0317297	0.062483
B	USC-FCT2	grain	unknown	apatite	397424	2425.83	3793.94	854.465	0.213496	0.0868648	0.0475104	0.0307407	0.0729348	0.177876	0.0746036	0.0425967	0.0307345	0.0601333
B	UT-DUR	shard	standard	apatite	421684	3055.26	3707.66	3730.61	0.24525	0.0945448	0.0490015	0.0293417	0.0791823	0.193872	0.08064	0.0448787	0.0299563	0.0652753
B	USC-FCT2	grain	unknown	zircon	430574	2812.57	3745.41	1166.07	0.111441	0.0778286	0.0661114	0.0760415	0.0771097	0.0942742	0.0733522	0.075918	0.0707336	0.0862124
B	USC-FCT1	grain	unknown	apatite	437241	4845.55	3536.96	1761.16	0.246922	0.11122	0.0750827	0.0456825	0.0817973	0.192634	0.0837138	0.0579769	0.0491786	0.0838889
B	USC-FCT1	grain	unknown	apatite	449649	2515.45	3773.12	1775.84	0.217944	0.0870495	0.0450938	0.0253711	0.0707573	0.167253	0.0724686	0.0378238	0.0231949	0.0577412
B	UT-DUR	shard	standard	apatite	526319	4660.43	3602.55	3355.07	0.234435	0.0900769	0.046656	0.0273053	0.0736926	0.186241	0.0754667	0.0398669	0.0259716	0.0579955
B	USC-FCT1	grain	unknown	titanite	532430	1712.67	3831	2823.01	0.192541	0.0854805	0.0502179	0.0384224	0.0653888	0.146832	0.069738	0.0397961	0.0364815	0.0639757
B	USC-FCT2	grain	unknown	zircon	543356	2968.89	3748.23	1048.04	0.104922	0.070697	0.063223	0.0666261	0.0711623	0.0897331	0.0683403	0.0674835	0.0668222	0.079738
B	USC-FCT1	grain	unknown	zircon	582802	3326.98	3711.61	2369.9	0.142447	0.0747616	0.0595016	0.0582678	0.0606464	0.0792041	0.061217	0.0571794	0.0544642	0.0711349
B	USC-FCT2	grain	unknown	zircon	601507	806.684	3731.23	1310.97	0.153381	0.115019	0.088085	0.0772573	0.0789966	0.136674	0.104241	0.0733195	0.0765493	0.0802454
B	USC-FCT1	grain	unknown	apatite	645768	2286.6	3784.24	2673.26	0.232996	0.100304	0.0586121	0.0437828	0.0878969	0.200135	0.0910505	0.0575399	0.0503905	0.0802978
B	UT-DUR	shard	standard	apatite	689659	4064.89	3711.4	2780.08	0.236717	0.104171	0.0481379	0.0307022	0.0780913	0.191135	0.0783973	0.043181	0.0282026	0.06365
B	USC-FCT2	grain	unknown	apatite	718178	3191.64	3833.81	231.996	0.218548	0.0871889	0.046757	0.0278962	0.0722694	0.169267	0.0688815	0.0396077	0.0268623	0.0596692
B	USC-FCT1	grain	unknown	apatite	720586	1992.92	3825.53	2332.58	0.244659	0.109094	0.06817	0.0523804	0.0986808	0.21425	0.104282	0.0742379	0.063842	0.0990201
B	USC-FCT2	grain	unknown	apatite	788737	3918.5	3880.62	365.279	0.216181	0.0857946	0.0488621	0.0309966	0.0713553	0.182694	0.0716174	0.0396974	0.0258011	0.0627064
B	USC-FCT2	grain	unknown	apatite	807441	913.455	3784.38	644.759	0.238613	0.130418	0.0467726	0.0309922	0.0679422	0.176182	0.0792611	0.0387968	0.0276495	0.0544237
B	USC-FCT2	grain	unknown	zircon	812997	3396.47	3791.5	467.436	0.168889	0.165329	0.169839	0.157717	0.171448	0.178932	0.167927	0.178361	0.172219	0.178719
B	USC-FCT2	grain	unknown	zircon	826146	3415.98	3728.88	938.95	0.081793	0.0628573	0.0678681	0.0577013	0.0625459	0.0744865	0.068136	0.0570496	0.0585219	0.0704168
B	USC-FCT1	grain	unknown	apatite	830220	2285.81	3796.65	2248.56	0.235546	0.102766	0.062766	0.0456988	0.0931693	0.19998	0.0917485	0.06814	0.0590582	0.0915818
B	USC-FCT1	grain	unknown	apatite	836146	3883.11	3716.77	2382.21	0.242612	0.0998789	0.0530814	0.0370132	0.0827036	0.197225	0.0836252	0.0518704	0.0416884	0.0737144
B	USC-FCT2	grain	unknown	zircon	860592	2704.04	3775.47	736.094	0.139441	0.144393	0.136624	0.134681	0.145477	0.144282	0.144268	0.148832	0.145379	0.155363
B	USC-FCT1	grain	unknown	apatite	881519	1634.93	3849.4	2424.74	0.230447	0.0966865	0.0600092	0.0509195	0.0891542	0.187499	0.0899221	0.065108	0.0571659	0.0865994
B	USC-FCT1	grain	unknown	apatite	925409	4102.87	3741.93	1329.39	0.219482	0.0870981	0.0453402	0.0262507	0.0682479	0.175063	0.0729175	0.0376454	0.0239419	0.0575905
B	USC-FCT1	grain	unknown	apatite	969671	2823.62	3749.07	2530.61	0.226106	0.0910636	0.0498641	0.0284389	0.0745202	0.181181	0.0734265	0.0412632	0.0313623	0.0699121
B	UT-DUR	shard	standard	apatite	975412	3815.04	3742.54	2941.9	0.223322	0.0942939	0.0498473	0.035344	0.0790752	0.183403	0.0792903	0.0490744	0.0379067	0.0700808
B	USC-FCT2	grain	unknown	apatite	1.00634e+06	3121.4	3757.21	573.831	0.220036	0.0943909	0.0570552	0.0421588	0.0835321	0.179184	0.0843604	0.053751	0.0486584	0.075347
B	USC-FCT2	grain	unknown	zircon	1.0093e+06	4405.88	3794.14	556.739	0.14886	0.151135	0.128695	0.111279	0.123369	0.159258	0.12316	0.118965	0.125609	0.143094
B	UT-DUR	shard	standard	apatite	1.01634e+06	1435.45	3810.02	3539.1	0.237362	0.100255	0.0493291	0.0316318	0.0764898	0.183708	0.077376	0.041917	0.0294115	0.0623802
B	USC-FCT2	grain	unknown	apatite	1.03764e+06	2586.5	3843.03	230.24	0.210169	0.0880871	0.0465575	0.0268121	0.0728636	0.171638	0.0717482	0.0406167	0.0264913	0.0601751
B	UT-DUR	shard	standard	apatite	1.05949e+06	4350.82	3706.37	2820.95	0.231072	0.103531	0.0504055	0.0336256	0.0759769	0.191749	0.0830287	0.0481709	0.0349406	0.0630295
B	USC-FCT1	grain	unknown	zircon	1.0743e+06	4261.72	3705.91	2194.58	0.154384	0.140255	0.129104	0.136589	0.143144	0.158422	0.135924	0.142958	0.145726	0.156393
B	UT-DUR	shard	standard	apatite	1.08023e+06	2157.93	3764.18	3792.72	0.251146	0.104676	0.0641956	0.0490955	0.0940108	0.208631	0.0988483	0.0671989	0.0578611	0.0848977
B	USC-FCT2	grain	unknown	zircon	1.12708e+06	4064.01	3826.53	747.765	0.102031	0.0861347	0.0930623	0.0808419	0.0832005	0.107857	0.088459	0.0844767	0.0861274	0.0983655
B	USC-FCT2	grain	unknown	zircon	1.26783e+06	3174.57	3738	1041.11	0.178156	0.145325	0.143684	0.145561	0.155907	0.161588	0.157444	0.156641	0.155736	0.163506
B	USC-FCT2	grain	unknown	zircon	1.35283e+06	1926.57	3887.11	1049.87	0.107349	0.0812245	0.0775011	0.0733048	0.0820814	0.0968573	0.0825013	0.0846052	0.082638	0.095481
B	UT-DUR	shard	standard	apatite	1.3895e+06	3770.1	3787.73	3583.31	0.233742	0.0961336	0.0490338	0.0278145	0.0770912	0.184141	0.0759942	0.0417754	0.0260405	0.0609007
B	USC-FCT1	grain	unknown	zircon	1.43191e+06	3118.06	3719.85	2012.28	0.0879966	0.0757809	0.0682491	0.062078	0.0698873	0.0833287	0.0710964	0.0638436	0.0632396	0.0747736
B	USC-FCT2	grain	unknown	zircon	1.43191e+06	3542.17	3827.09	407.366	0.154757	0.101424	0.0943671	0.0992894	0.101164	0.111661	0.105376	0.100656	0.101971	0.110732
B	USC-FCT2	grain	unknown	zircon	1.47265e+06	1944.12	3867.68	1425.52	0.0889027	0.0553864	0.0434341	0.0452606	0.0457585	0.0757925	0.0567758	0.0434264	0.0431662	0.0607424
B	USC-FCT2	grain	unknown	apatite	1.47673e+06	1339.15	3931.98	688.47	0.231683	0.106443	0.0471921	0.0302537	0.0696021	0.176135	0.0756236	0.0396792	0.0292409	0.058074
B	USC-FCT1	grain	unknown	zircon	1.52525e+06	4174.72	3743.43	1708.97	0.1423	0.125965	0.151114	0.126799	0.142787	0.143952	0.148684	0.147842	0.140439	0.153164
B	UT-DUR	shard	standard	apatite	1.64988e+06	2856.87	3716.47	3769.35	0.241908	0.104282	0.063584	0.0510992	0.0966413	0.202164	0.094368	0.0691458	0.059752	0.0913419
B	USC-FCT2	grain	unknown	zircon	1.67007e+06	1611.7	3931.01	993.952	0.143493	0.118483	0.111441	0.11225	0.122746	0.130331	0.116496	0.121395	0.119266	0.138732
B	SL1	shard	standard	zircon	1.74211e+06	1276.85	3902.75	2005.91	0.138676	0.0983358	0.0829169	0.0915629	0.0754308	0.110929	0.0837564	0.0712282	0.0800303	0.0862259
B	SL1	shard	standard	zircon	1.88989e+06	994.271	3778.26	3213.12	0.141287	0.154894	0.099138	0.10466	0.104698	0.122761	0.106791	0.102116	0.100213	0.109028
B	SL1	shard	standard	zircon	2.0775e+06	720.704	3713.97	2690.38	0.146241	0.112273	0.130524	0.109885	0.118745	0.143145	0.129141	0.135454	0.137716	0.144919
B	UT-DUR	shard	standard	apatite	2.13416e+06	3351.6	3742.96	2939.74	0.231651	0.0944385	0.0507319	0.0339541	0.0796926	0.188118	0.0809787	0.0484933	0.0372649	0.0681514
B	UT-DUR	shard	standard	apatite	2.17176e+06	3057.52	3730.91	3088.88	0.239442	0.0985017	0.0533426	0.0379287	0.0844069	0.199119	0.0846449	0.0545413	0.0434706	0.0762265
B	SL1	shard	standard	zircon	2.24213e+06	831.554	3788.05	2248.1	0.155552	0.13638	0.101442	0.11136	0.106081	0.138668	0.113702	0.100358	0.101104	0.101071
B	USC-FCT2	grain	unknown	zircon	2.4151e+06	686.036	3649.18	1405.48	0.121508	0.0699731	0.0797515	0.0640051	0.0675728	0.116236	0.0792133	0.0690494	0.0711736	0.075549
B	USC-FCT2	grain	unknown	zircon	2.46492e+06	2363.3	3812.72	1168.78	0.125202	0.113001	0.114598	0.108776	0.118644	0.127666	0.130157	0.125103	0.121777	0.132987
B	SL1	shard	standard	zircon	2.48048e+06	1327.21	3826.58	3173.4	0.163397	0.151239	0.164588	0.174004	0.18335	0.200503	0.183044	0.185567	0.18505	0.189007
B	SL1	shard	standard	zircon	2.48733e+06	1128.59	3818	2680.05	0.270725	0.268509	0.235713	0.226521	0.231797	0.224897	0.229429	0.233678	0.235705	0.249378
B	UT-DUR	shard	standard	apatite	2.88531e+06	2465.26	3769.38	3296.3	0.239342	0.100311	0.0575135	0.0418203	0.0874873	0.193948	0.0874215	0.0627823	0.052656	0.0804487
B	USC-FCT1	grain	unknown	titanite	3.09865e+06	4521.16	3696.57	2165.87	0.197556	0.0920614	0.0564966	0.0499117	0.0750451	0.169341	0.0837884	0.0569425	0.0553659	0.0743431
B	USC-FCT1	grain	unknown	zircon	3.14624e+06	4683.58	3677.96	1580.05	0.1827	0.145916	0.139888	0.151783	0.161702	0.175292	0.168829	0.161825	0.173004	0.186548
B	SL1	shard	standard	zircon	3.19088e+06	1239.75	3843.29	2963.74	0.185595	0.176966	0.197472	0.203382	0.215411	0.234711	0.218307	0.221242	0.220012	0.228146
B	USC-FCT1	grain	unknown	titanite	3.34292e+06	4740.65	3647.96	2047.06	0.196555	0.0876873	0.0492754	0.0383731	0.0685004	0.157754	0.0728979	0.0460782	0.0401138	0.0744708
B	SL1	shard	standard	zircon	3.35903e+06	1210.65	3848.35	2305.8	0.261626	0.259854	0.269829	0.268544	0.285512	0.29345	0.287485	0.293657	0.294151	0.301659
B	SL1	shard	standard	zircon	3.557e+06	821.11	3747.21	3013.95	0.177002	0.162906	0.170783	0.158106	0.179709	0.201186	0.189213	0.195063	0.193032	0.19692
B	USC-FCT2	grain	unknown	zircon	3.59552e+06	1168.91	3886.3	1224.2	0.130616	0.105651	0.0832434	0.0812722	0.0888868	0.114757	0.0894813	0.085022	0.0846733	0.0955478
B	UT-DUR	shard	standard	apatite	3.6896e+06	4803.5	3567.69	2726.51	0.224838	0.0952321	0.0488164	0.0301609	0.0746003	0.181898	0.0774355	0.0425191	0.0309112	0.0640165
B	UT-DUR	shard	standard	apatite	3.71905e+06	1925.05	3794.65	3877.03	0.250447	0.0992261	0.0525002	0.0316732	0.0828883	0.20064	0.083412	0.0486348	0.035575	0.0692335
B	USC-FCT1	grain	unknown	zircon	3.72553e+06	2728.85	3759.6	2067.09	0.202575	0.18973	0.189678	0.19158	0.201528	0.213007	0.209188	0.208784	0.208225	0.214176
B	USC-FCT1	grain	unknown	titanite	3.99684e+06	3573.26	3718.78	2325.15	0.315328	0.274267	0.266138	0.271018	0.308558	0.347966	0.337902	0.332453	0.331846	0.349497
B	UT-DUR	shard	standard	apatite	4.00054e+06	1700.35	3811	3899.15	0.247171	0.100131	0.050922	0.03035	0.0814648	0.193816	0.081398	0.0458067	0.0326898	0.0695659
B	USC-FCT1	grain	unknown	zircon	4.42e+06	4422.43	3748.93	1648.81	0.19724	0.181913	0.16298	0.182795	0.189237	0.223519	0.193526	0.192609	0.201993	0.209978
B	UT-DUR	shard	standard	apatite	4.81335e+06	3427.58	3732.18	3803.11	0.238461	0.0950248	0.0494205	0.0283919	0.0792153	0.189128	0.0772819	0.0432499	0.0290878	0.0640735
B	USC-FCT2	grain	unknown	titanite	5.59524e+06	3640.7	3807.25	747.603	0.178987	0.0898173	0.0684006	0.0601613	0.0852939	0.152733	0.0874858	0.0725271	0.0686381	0.0872294
C	MG1	shard	standard	titanite	21112	1375.5	367.45	1042.12	0.17385	0.0771184	0.0440995	0.0239827	0.063692	0.240244	0.0698468	0.0310801	0.0235747	0.0572895
C	MG1	shard	standard	titanite	50002.1	552.817	389.9	1055.87	0.20983	0.0799677	0.0490432	0.024444	0.0614507	0.374527	0.0660557	0.0339578	0.0206407	0.0506776
C	MG1	shard	standard	titanite	61113.7	2433.5	303.795	1028.5	0.197417	0.0751801	0.0391789	0.0222545	0.0636168	0.164343	0.0688993	0.0336375	0.0205519	0.0536228
C	UT-DUR	shard	standard	apatite	83892.4	2490.24	311.182	1718.38	0.229018	0.0877804	0.0435679	0.026482	0.0737114	0.193165	0.073624	0.0411303	0.0253052	0.059182
C	UT-DUR	shard	standard	apatite	97411.5	1187.87	364.174	763.109	0.213856	0.0919032	0.04726	0.0291733	0.0745412	0.329566	0.0733632	0.0471387	0.0322817	0.0647481
C	MG1	shard	standard	titanite	152599	967.159	377.67	1152.97	0.204974	0.0810441	0.0428406	0.0279325	0.0671136	0.280656	0.0637472	0.0376264	0.0269967	0.0544188
C	MG1	shard	standard	titanite	197231	1857.63	336.432	1128.71	0.202588	0.0848208	0.04216	0.0256947	0.0651129	0.181256	0.067179	0.0362716	0.0246144	0.0540238
C	MG1	shard	standard	titanite	213898	1809.91	355.231	2058.49	0.205439	0.0894318	0.0481703	0.0342242	0.0694798	0.195699	0.067969	0.0455828	0.0379654	0.0617277
C	MG1	shard	standard	titanite	222787	1328.11	380.462	2050.19	0.192448	0.0821748	0.0434172	0.0295729	0.0697076	0.294211	0.0675899	0.04192	0.0301714	0.0623943
C	UT-DUR	shard	standard	apatite	231491	2514.11	335.349	2778.97	0.23301	0.099276	0.0509519	0.0328732	0.0780892	0.208159	0.0899615	0.0517582	0.0325006	0.0631203
C	MG1	shard	standard	titanite	339459	853.732	399.755	2028.11	0.205898	0.0808826	0.0415768	0.028337	0.066691	0.310418	0.0638403	0.0362827	0.0271874	0.05334
C	UT-DUR	shard	standard	apatite	348904	611.394	400.525	789.137	0.208965	0.087609	0.0460712	0.0285863	0.0702224	0.22354	0.0699075	0.0400014	0.0256179	0.057141
C	UT-DUR	shard	standard	apatite	384275	2092.35	349.283	1751.59	0.221956	0.0893448	0.0464621	0.0288678	0.0721712	0.198652	0.0753994	0.0432236	0.0330597	0.0608679
C	UT-DUR	shard	standard	apatite	406869	1076.96	390.725	1743.31	0.222294	0.0878108	0.0482455	0.0266367	0.0734544	0.214859	0.0733019	0.0430201	0.0290301	0.0608622
C	UT-DUR	shard	standard	apatite	418351	1830.04	373.933	2886.34	0.221193	0.0920551	0.0480973	0.0262468	0.0753668	0.202065	0.0777323	0.0443209	0.0320016	0.0634494
C	UT-DUR	shard	standard	apatite	422610	2891.34	300.716	1699.99	0.207306	0.0897084	0.0434519	0.0249574	0.069747	0.183833	0.0756619	0.0428406	0.0263522	0.057651
C	UT-DUR	shard	standard	apatite	503540	1607.78	365.888	1724.72	0.216143	0.0893377	0.0454026	0.0260327	0.0714125	0.234622	0.0736878	0.0432849	0.028418	0.0616203
C	UT-DUR	shard	standard	apatite	504651	2903.53	325.583	2761.97	0.232681	0.0940506	0.0483928	0.0296142	0.0771648	0.198434	0.083512	0.0443892	0.0299641	0.0602865
C	MG1	shard	standard	titanite	572802	2274.78	334.702	2033.37	0.207993	0.0874253	0.0463632	0.0287511	0.0731433	0.188529	0.07534	0.0449621	0.0327535	0.0637991
C	UT-DUR	shard	standard	apatite	580580	2189.37	354.744	2765.04	0.233524	0.0926657	0.0505462	0.0305266	0.0796741	0.203261	0.0759066	0.0476419	0.0366088	0.0679981
C	UT-DUR	shard	standard	apatite	609470	2232.49	351.947	805.226	0.21196	0.0880585	0.0443718	0.0248109	0.0697904	0.173237	0.0707083	0.0385538	0.023572	0.0553323
C	MG1	shard	standard	titanite	678177	2095.33	386.281	3237.17	0.24383	0.096728	0.0481675	0.0289425	0.0811438	0.205882	0.0816811	0.0466459	0.0327324	0.0687727
C	MG1	shard	standard	titanite	738364	2482.41	353.521	3228.89	0.217163	0.0874543	0.0448183	0.0249431	0.0735795	0.18469	0.0846558	0.048354	0.027109	0.0595943
C	UT-DUR	shard	standard	apatite	762069	2745.42	303.815	756.962	0.221343	0.0901685	0.0464982	0.0283562	0.0715276	0.192585	0.0777852	0.0414003	0.0282807	0.0562126
C	UT-DUR	shard	standard	apatite	859110	1382.74	405.076	2882.92	0.227996	0.091667	0.0479211	0.0281838	0.0761851	0.201756	0.0760046	0.0427742	0.030382	0.0633386
C	UT-DUR	shard	standard	apatite	910779	1737.44	359.506	786.782	0.21248	0.0866658	0.0460889	0.0275261	0.0715188	0.184422	0.0748113	0.041991	0.0265221	0.0577649
C	SL1	shard	standard	zircon	929113	1284	396.424	1409.42	0.108458	0.0730676	0.0778361	0.0668273	0.0800437	0.203144	0.0770138	0.0715232	0.0710554	0.0843971
C	MG1	shard	standard	titanite	1.14153e+06	1131.59	425.031	3198.79	0.216702	0.0889959	0.0495718	0.0327	0.0756479	0.24936	0.0730258	0.0448716	0.0355283	0.0612984
C	SL1	shard	standard	zircon	1.87638e+06	3243.94	324.685	2471.5	0.10432	0.0753973	0.0708302	0.0696897	0.0743927	0.102975	0.0941373	0.106664	0.0869181	0.0901497
C	SL1	shard	standard	zircon	1.95527e+06	807.792	408.289	489.92	0.0776408	0.0496678	0.0459618	0.0447061	0.0507556	0.118114	0.0475355	0.0489513	0.0523532	0.0519363
C	SL1	shard	standard	zircon	2.05638e+06	3087.84	330.269	1390.17	0.0920287	0.0651588	0.0569748	0.0568146	0.0635816	0.0885778	0.0697364	0.0640302	0.0598425	0.0690732
C	SL1	shard	standard	zircon	2.50177e+06	2729.21	346.533	1350.55	0.0999671	0.0672669	0.0625475	0.060589	0.069017	0.098625	0.07163	0.0689529	0.0655181	0.0752391
C	SL1	shard	standard	zircon	2.5114e+06	2559.65	348.888	480.626	0.0880577	0.0609751	0.0545349	0.0542565	0.0605626	0.0958627	0.0649284	0.0617756	0.0620774	0.0696527
C	MG1	shard	standard	titanite	2.51585e+06	2713.41	356.263	1994.41	0.222828	0.089703	0.0507569	0.0341379	0.0747772	0.179687	0.0788562	0.0505862	0.0409855	0.0648289
C	SL1	shard	standard	zircon	2.68548e+06	1447.15	387.295	604.787	0.124298	0.106963	0.103158	0.100702	0.111758	0.129517	0.117406	0.115168	0.11446	0.12895
C	SL1	shard	standard	zircon	2.95364e+06	2762.5	342.531	2466.89	0.124699	0.0945237	0.0942636	0.0919693	0.100386	0.121215	0.111821	0.111508	0.111342	0.120739
C	SL1	shard	standard	zircon	2.96605e+06	3174.89	324.785	435.689	0.100996	0.0706589	0.0663369	0.0653549	0.0769149	0.106177	0.0801122	0.0879881	0.0739829	0.0843643
C	MG1	shard	standard	titanite	3.11384e+06	1549.38	414.636	3165.38	0.228216	0.0934559	0.0503337	0.0329012	0.0779538	0.218685	0.078096	0.046769	0.035608	0.0653638
C	SL1	shard	standard	zircon	3.28921e+06	1901.71	385.619	1438.99	0.0856656	0.0566193	0.049361	0.0473106	0.0563773	0.0793153	0.0553285	0.0517307	0.0510794	0.0611436
C	SL1	shard	standard	zircon	3.37681e+06	2276.15	394.602	2434.51	0.100408	0.0739361	0.0683964	0.0677777	0.0740999	0.0956519	0.0816841	0.0807701	0.0802396	0.0871166
C	MG1	shard	standard	titanite	3.91961e+06	610.301	467.479	3353.84	0.220766	0.0915181	0.0523931	0.0349041	0.0785354	0.260659	0.0795346	0.0506252	0.039915	0.0678953
C	SL1	shard	standard	zircon	6.81177e+06	1360.61	442.288	2468.11	0.0847196	0.0511594	0.0432763	0.0413902	0.0499376	0.0876661	0.0536421	0.0493974	0.0481874	0.0562084
C	SL1	shard	standard	zircon	7.23512e+06	1963.88	359.051	445.054	0.124937	0.0973048	0.094261	0.0943854	0.100762	0.126031	0.103104	0.0999631	0.102786	0.113645
RSD = relative standard deviation
